# Supplementary material for: Lattice relaxation effects on the collective resonance spectra of a finite dipole array
Source: Royal Society of Chemistry journal article supplement (doi:10.1039/d3cp00195d), 2023-01-01
Supplement: d3cp00195d1.pdf [file d3cp00195d1.pdf]

Supplementary information for

Lattice relaxation effect on collective resonance spectra of a  
finite dipole array

Baodong Gai\*, Jingwei Guo and Yuqi Jin

Key Laboratory of Chemical Lasers, Dalian Institute of Chemical Physics, Chinese Academy of  
Sciences, Dalian 116023, China

\*Corresponding to [bdgai@dicp.ac.cn](mailto:bdgai@dicp.ac.cn)

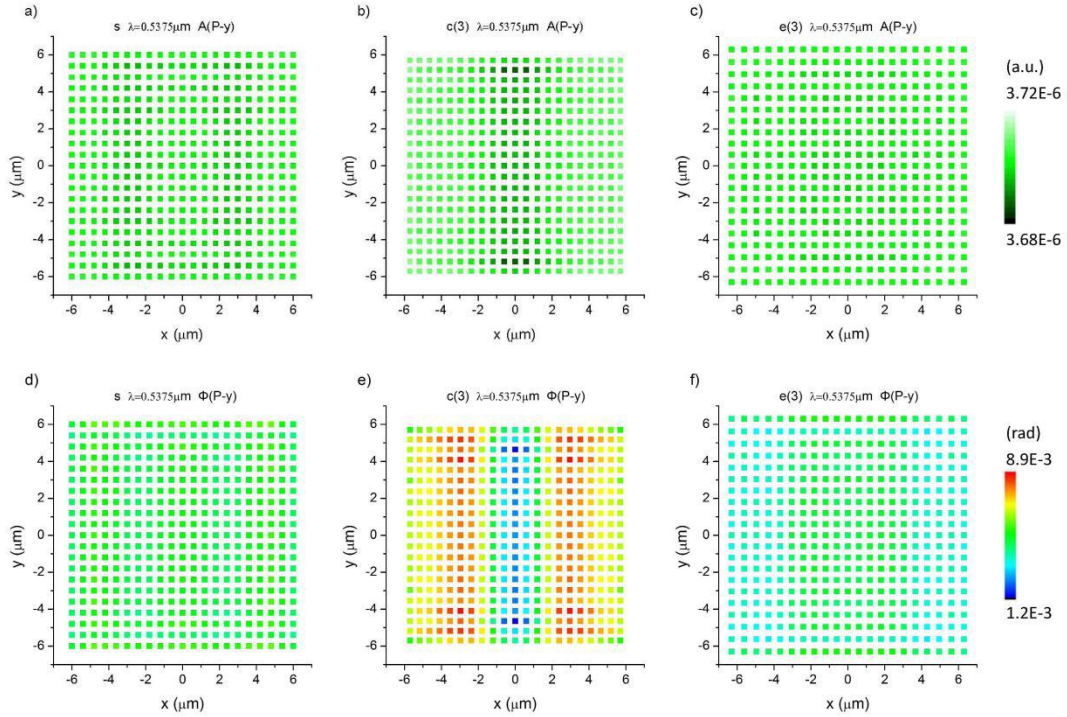

Fig. S1 P-y amplitude (A) and phase (P) distribution of the pristine (s), contracted [c(3)] and expanded [e(3)] array in Fig. 2. The excitation plane wave is y-direction linear polarized, +z direction transmitting with wavelength of  $0.5375 \mu\text{m}$ . a-c) and d-f) share the same color scale bar respectively.

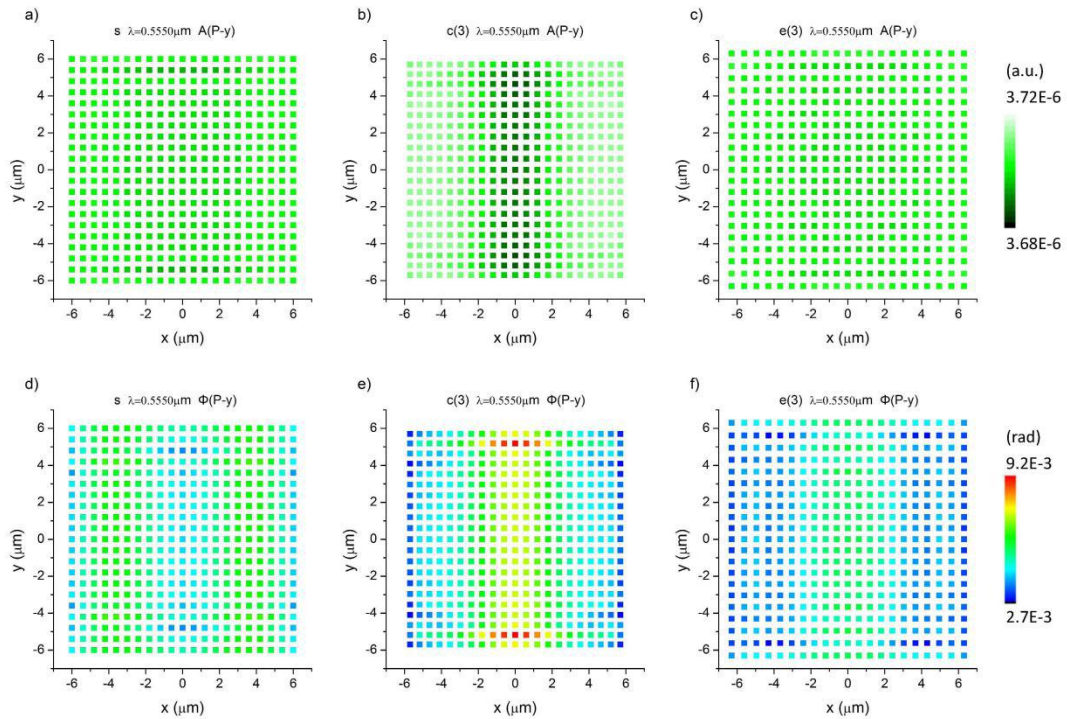

Fig. S2 P-y amplitude (A) and phase (P) distribution of the pristine (s), contracted [c(3)] and expanded [e(3)] array in Fig. 2. The excitation plane wave is y-direction linear polarized, +z direction transmitting with wavelength of  $0.5550 \mu\text{m}$ . a-c) and d-f) share the same color scale bar respectively.

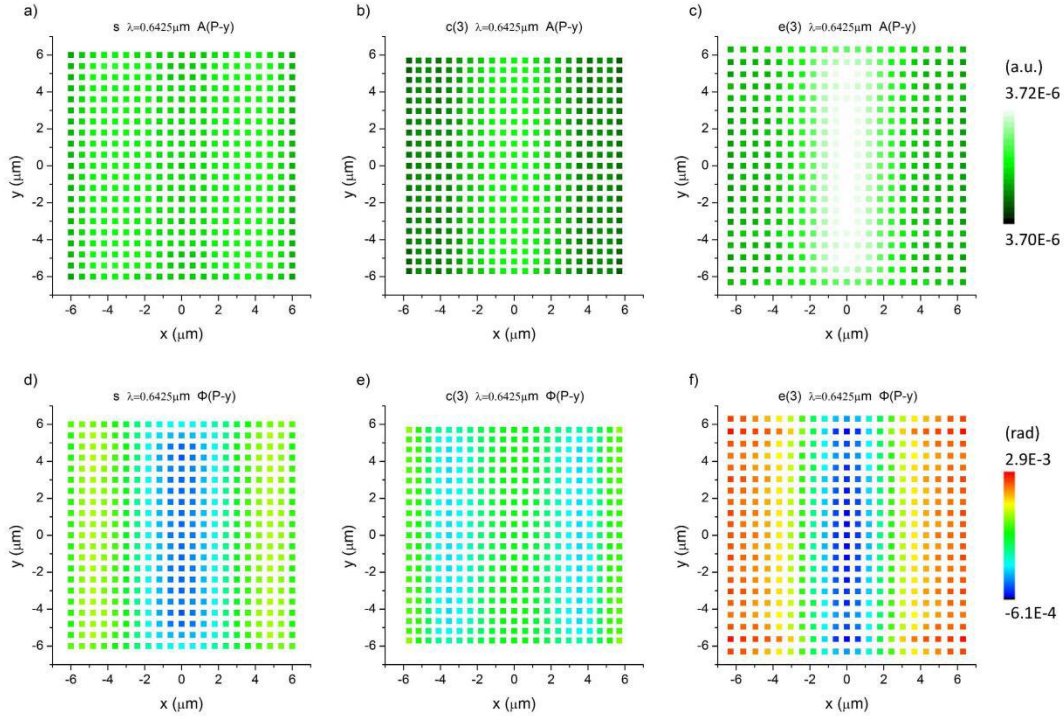

Fig. S3 P-y amplitude (A) and phase (P) distribution of the pristine (s), contracted [c(3)] and expanded [e(3)] array in Fig. 2. The excitation plane wave is y-direction linear polarized, +z direction transmitting with wavelength of  $0.6425 \mu\text{m}$ . a-c) and d-f) share the same color scale bar respectively.

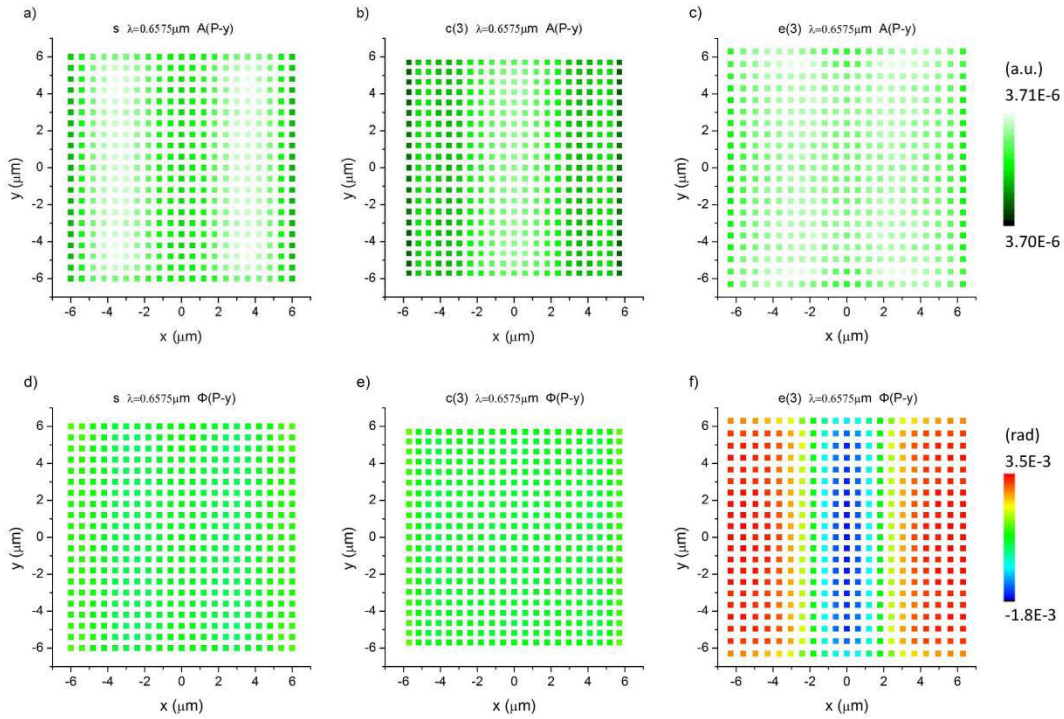

Fig. S4 P-y amplitude (A) and phase (P) distribution of the pristine (s), contracted [c(3)] and expanded [e(3)] array Fig. 2. The excitation plane wave is y-direction linear polarized, +z direction transmitting with wavelength of  $0.6575 \mu\text{m}$ . a-c) and d-f) share the same color scale bar respectively.

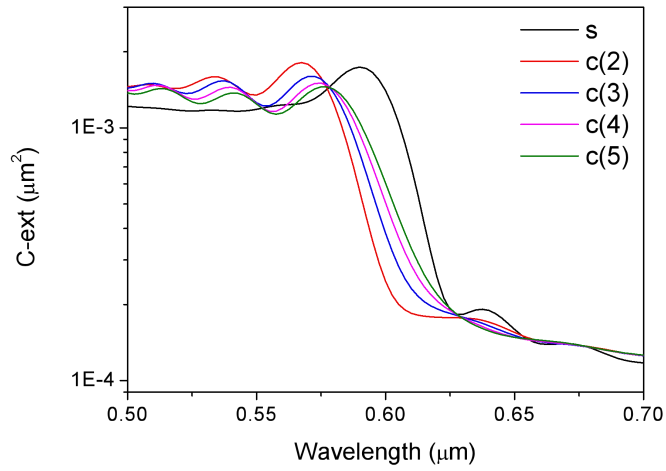

Fig. S5 Extinction spectra of pristine and relaxed array. *s*: pristine. The pristine array is a 21\*21 square with  $a = 0.6 \mu\text{m}$ , and the lattice element is sphere ( $r=23.26\text{nm}$ ,  $n=1.5$ ). *c*(*p*): contracted array according to a *p*-order polynomial. *s* and *c*(3) in Fig. 2 are also given for comparison. The environment is vacuum.

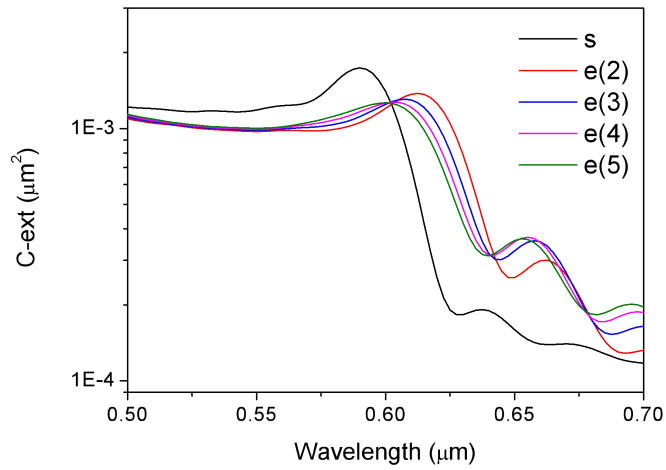

Fig. S6 Extinction spectra of pristine and relaxed array. *s*: pristine. The pristine array is a 21\*21 square with  $a = 0.6 \mu\text{m}$ , and the lattice element is sphere ( $r=23.26\text{nm}$ ,  $n=1.5$ ). *e*(*p*): expanded array according to an *p*-order polynomial. *s* and *e*(3) in Fig. 2 are also given for comparison. The environment is vacuum.

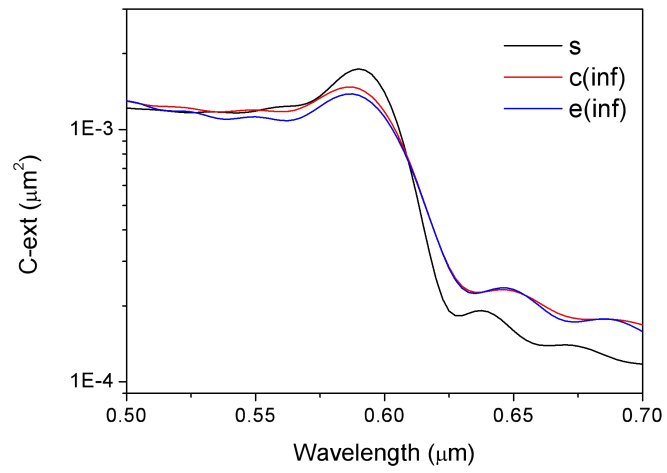

Fig. S7 Extinction spectra of pristine and relaxed array.  $s$ : pristine result shown in Fig. 2. The pristine array is a  $21 \times 21$  square with  $a = 0.6 \mu\text{m}$ , and the lattice element is sphere ( $r=23.26\text{nm}$ ,  $n=1.5$ ).  $c(\text{inf})$ ,  $e(\text{inf})$ : the “hard” contracted and expanded array equivalent to an infinite-order polynomial in Eq. 10. The environment is vacuum.
